# Supplementary material for: An ensemble model of machine learning regression techniques and color spaces integrated with a color sensor: application to color-changing biochemical assays
Source: Royal Society of Chemistry journal article supplement (doi:10.1039/d4ra07510b), 2025-01-01
Supplement: d4ra07510b1.pdf [file d4ra07510b1.pdf]

## Supporting Information

# An Ensemble Model of Machine Learning Regression Techniques and Color Spaces Integrated to a Color Sensor: Application to Color-Changing Biochemical Assays

Min Joh<sup>a</sup>, Surjith Kumaran<sup>a</sup>, Younseo Shin<sup>a</sup>, Hyunji Cha<sup>a</sup>, Euna Oh<sup>a</sup>, Kyu Hyoung Lee<sup>b</sup>, and Hyo-Jick Choi<sup>a,\*</sup>

<sup>a</sup>Department of Chemical and Materials Engineering, University of Alberta, Edmonton, AB T6G 1H9, Canada

<sup>b</sup>Department of Materials Science and Engineering, Yonsei University, Seoul 03722, Republic of Korea

\* Corresponding author: [hyojick@ualberta.ca](mailto:hyojick@ualberta.ca) (H.-J.C).

**Abstract:** Non-destructive color sensors are widely applied for rapid analysis of various biological and healthcare point-of-care applications. However, existing RGB-based color sensor systems, relying on the conversion to human-perceptible color spaces like HSL or HSV, exhibit limitations compared to spectroscopic methods. The integration of machine learning (ML) techniques presents an opportunity to enhance data analysis and interpretation, enabling insights discovery, prediction, process automation, and decision-making. In this study, we utilized four different regression models integrated with an RGB sensor for colorimetric analysis. Colorimetric protein concentration assays, such as BCA and Bradford analysis, were chosen as model studies to evaluate the performance of the ML-based color sensor. Leveraging regression models, the sensor effectively interprets and processes color data, facilitating precision color detection and analysis. Furthermore, the incorporation of diverse color spaces enhances the sensor's adaptability to various color perception models, promising precise measurement, and analysis capabilities for a range of applications.

## Supporting Information

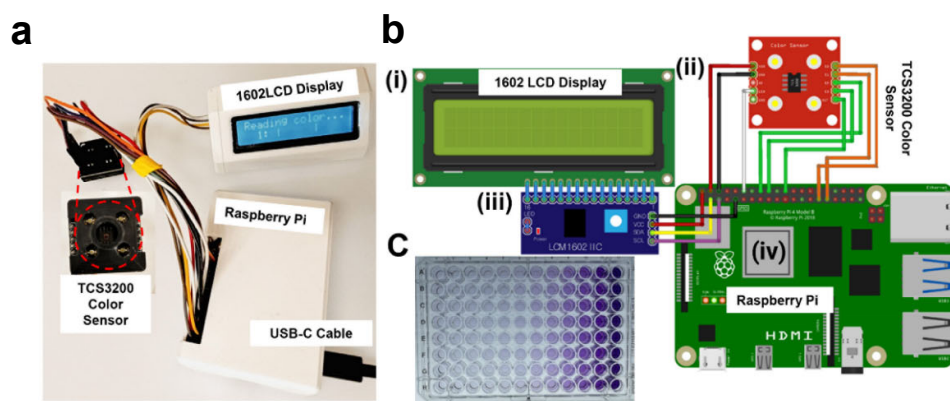

**Figure S1.** Color sensor for the determination of protein concentration: Photo of the fabricated prototype (a), circuit diagram of the LCD display (b-i), RGB sensor (b-ii), LCD circuit module (b-iii), Raspberry Pi minicomputer (b-iv), and 96-well plate BCA Assay used in the commercial plate reader (c).

## Supporting Information

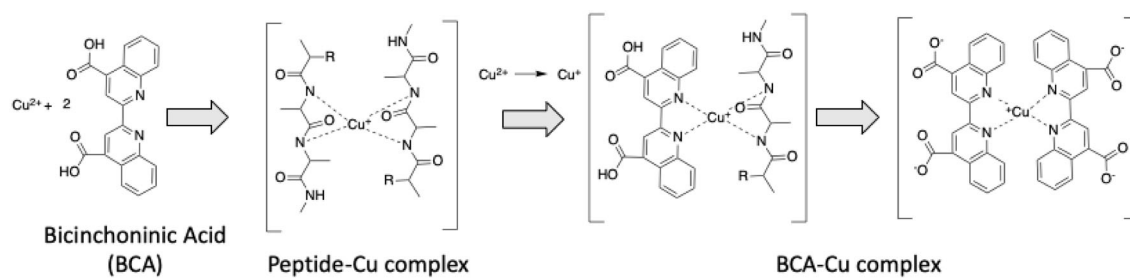

**Figure S2.** Mechanism of BCA assay for protein quantification.

## Supporting Information

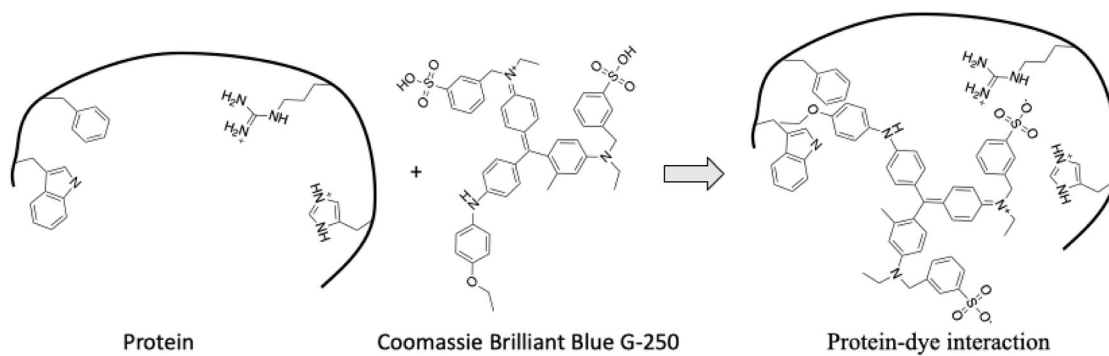

**Figure S3.** Mechanism of Bradford assay for protein quantification.

## Supporting Information

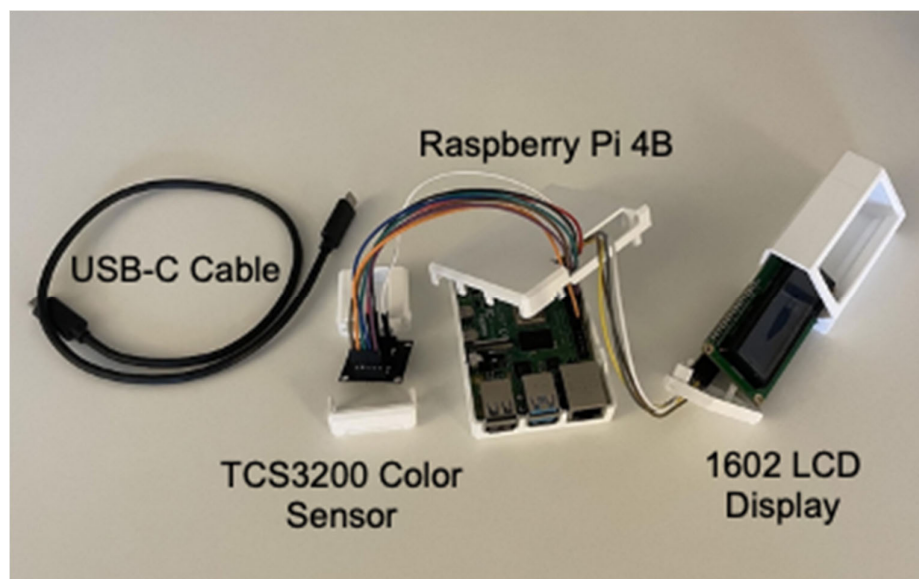

**Figure S4.** Image of manufactured prototype of the color sensor with labels

## Supporting Information

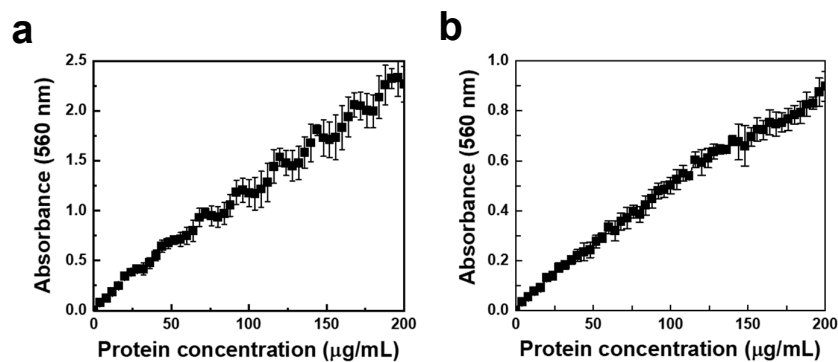

**Figure S5.** Protein quantitation curve of absorbance at 560 nm vs protein concentration (0-200  $\mu\text{g/mL}$ ) in  $\text{H}_2\text{O}$  of BCA assay (a), Bradford assay (b).

## Supporting Information

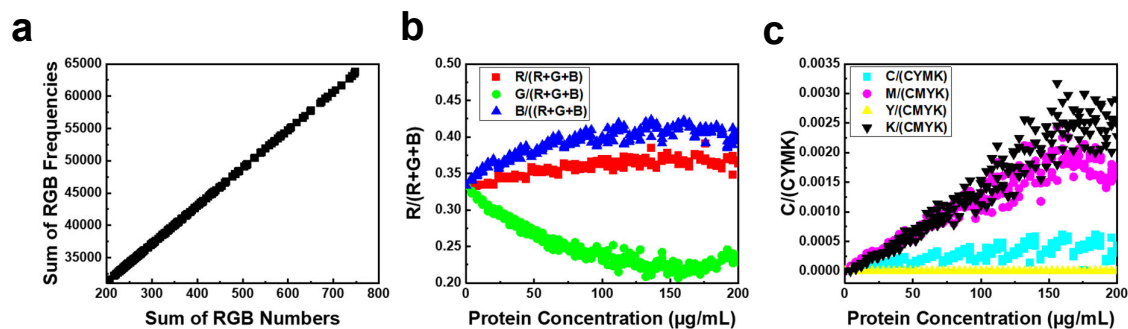

**Figure S6.** RGB color component values vs. frequency of color sensor output values (a), ratio of individual colors (R, G, B) to the sum of RGB with increasing protein concentration (b), and ratio of individual C, M, Y, K colors to the sum of CMYK (c) with increasing protein concentration for the BCA assay test.

## Supporting Information

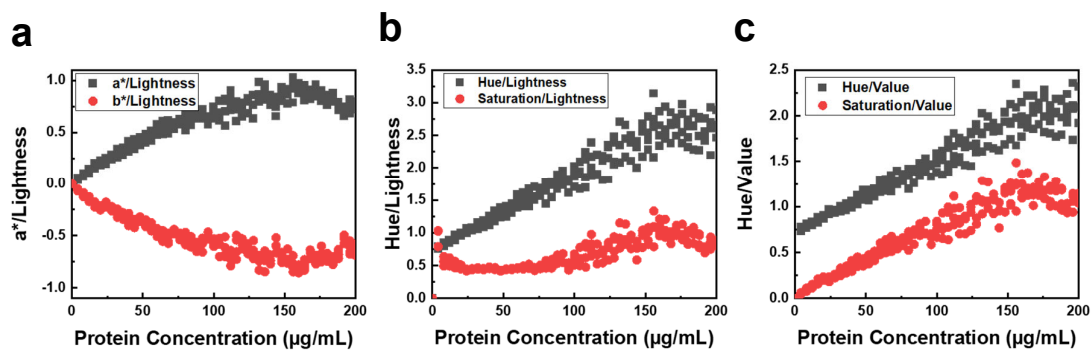

**Figure S7.** Calibration curves for CIELAB, HSL and HSV values: a\* value (green) and b\* value (blue) over lightness in CELAB (a) hue and saturation over lightness vs. increasing protein concentration (b), and corresponding hue and saturation over value in HSV (c), for 0-200 µg/mL of BSA protein samples in the Bradford assay



## Supporting Information

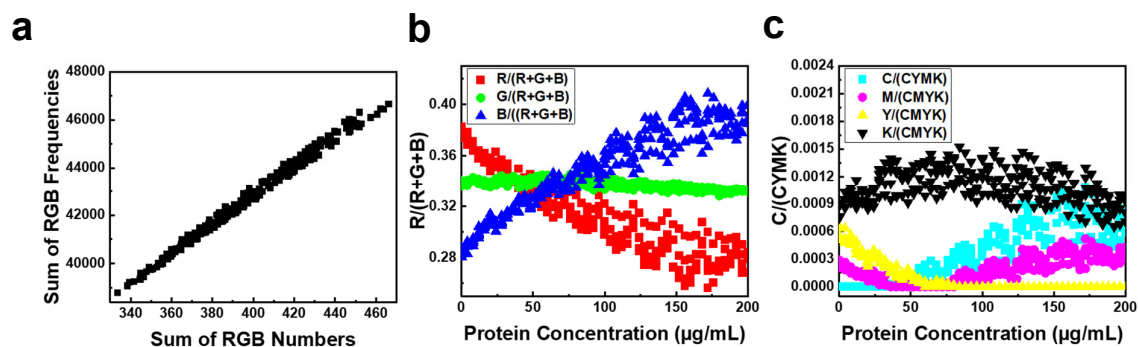

**Figure S8.** Sum of RGB color component values vs. frequency of color sensor outputs (a), ratio of individual R, G, B colors to the sum of RGB (b), and ratio of individual C, M, Y, K colors to the sum of CMYK (c) with increasing protein concentration for the Bradford assay test

## Supporting Information

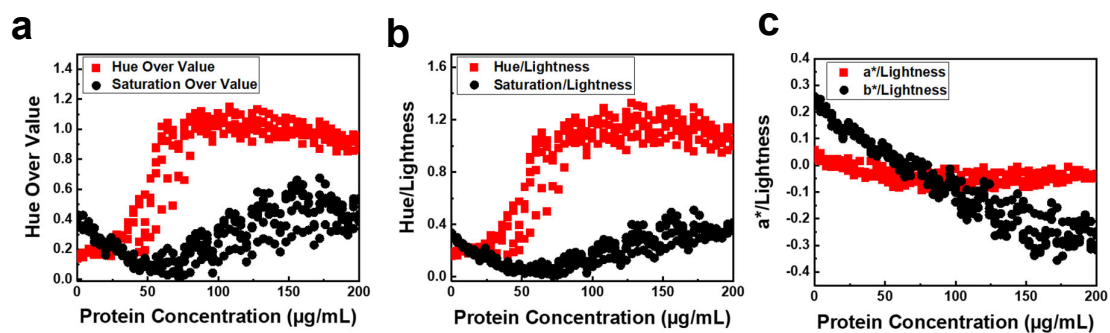

**Figure S9.** Calibration curves for HSL values: hue and saturation over lightness vs. increase in protein concentration (a), corresponding hue and saturation over value in HSV (b), and the  $a^*$  value (green) and  $b^*$  value (blue) over lightness in CIELAB (c) for 0-200  $\mu\text{g/mL}$  BSA protein samples for the Bradford assay.

## Supporting Information

**Table S1. Summary of Regression model error matrices of various color models**

### HSL

| Regression model  | MAE       | MSE         | RMSE      | R <sup>2</sup> |
|-------------------|-----------|-------------|-----------|----------------|
| Random forest     | 7.252699  | 93.10432    | 9.649048  | 0.959404       |
| Gradient boosting | 7.619387  | 96.647119   | 9.830927  | 0.957859       |
| SVM               | 8.611231  | 111.836115  | 10.575260 | 0.951237       |
| MLP               | 29.482344 | 1260.028438 | 35.496879 | 0.450596       |

### RGB

| Regression model  | MAE       | MSE        | RMSE      | R <sup>2</sup> |
|-------------------|-----------|------------|-----------|----------------|
| Random forest     | 8.100157  | 106.597984 | 10.324630 | 0.953521       |
| Gradient boosting | 8.945299  | 128.054205 | 11.316104 | 0.944165       |
| SVM               | 7.309625  | 80.945129  | 8.996951  | 0.964706       |
| MLP               | 11.024903 | 180.368798 | 13.430145 | 0.921355       |

### CIELAB

| Regression model  | MAE      | MSE        | RMSE      | R <sup>2</sup> |
|-------------------|----------|------------|-----------|----------------|
| Random forest     | 7.608305 | 94.469397  | 9.719537  | 0.958809       |
| Gradient boosting | 7.603124 | 92.615470  | 9.623693  | 0.959617       |
| SVM               | 8.690862 | 147.183263 | 12.131911 | 0.935824       |
| MLP               | 7.366562 | 87.956671  | 9.378522  | 0.961649       |

### HSV

| Regression model  | MAE       | MSE        | RMSE      | R <sup>2</sup> |
|-------------------|-----------|------------|-----------|----------------|
| Random forest     | 7.257158  | 85.341868  | 9.238066  | 0.962789       |
| Gradient boosting | 7.977991  | 102.496236 | 10.124042 | 0.955309       |
| SVM               | 8.200111  | 106.195190 | 10.305105 | 0.953696       |
| MLP               | 25.362530 | 980.959484 | 31.320273 | 0.572277       |

### CMYK

| Regression model  | MAE       | MSE         | RMSE      | R <sup>2</sup> |
|-------------------|-----------|-------------|-----------|----------------|
| Random forest     | 8.192314  | 115.362849  | 10.740710 | 0.949699       |
| Gradient boosting | 7.449949  | 91.161053   | 9.547830  | 0.960251       |
| SVM               | 7.756273  | 90.476935   | 9.511936  | 0.960550       |
| MLP               | 29.315475 | 1223.267778 | 34.975245 | 0.466624       |

## Supporting Information

**Table S2. Summary of previous color sensor and regression model work reported**

| <b>Detector Device</b> | <b>Target Object</b>         | <b>Colorimetry Model</b> | <b>ML Model</b>       | <b>Performance</b> | <b>Reference</b> |
|------------------------|------------------------------|--------------------------|-----------------------|--------------------|------------------|
| Smartphone Camera      | pH values from pH strips     | Mean RGB                 | LS-SVM                | Accuracy = 100%    | 1                |
| CMOS camera            | Concentration of a laser dye | HSV and RGB              | Polynomial regression | Accuracy = 95.5%   | 2                |
| TCS34725 on RPi4       | Concentrations of food dyes  | RGB Ratios               | Linear Regression     | R-square = 99.3%   | 3                |
| TCS3200 on Arduino     | Concentration of cyanide     | RGB                      | Linear Regression     | R-square = 98.0%   | 4                |

## Supporting Information

**Table S3. Summary of advantages and drawbacks of regression models used in this study**

| Regression models                 | Advantages                                                                                                                                                                                                                                                                                                                                                              | Drawbacks                                                                                                                                                                                                   |
|-----------------------------------|-------------------------------------------------------------------------------------------------------------------------------------------------------------------------------------------------------------------------------------------------------------------------------------------------------------------------------------------------------------------------|-------------------------------------------------------------------------------------------------------------------------------------------------------------------------------------------------------------|
| Random Forest Regressor (RFR)     | An ensemble method used for predicting continuous outcomes by combining the outputs of multiple decision tree regressor, enhancing accuracy and robustness through max voting. <sup>5</sup> This method reduces variance and overfitting, providing stable predictions, particularly advantageous in color sensor data susceptible to environmental noise. <sup>6</sup> | It can be computationally intensive and may not perform well with high-dimensional data. <sup>9</sup>                                                                                                       |
| Gradient Boosting Regressor (GBR) | Combines multiple weak learners (decision trees) into a strong model, improving accuracy. Each tree learns from the errors of the previous one, optimizing predictions iteratively. <sup>9</sup> Additionally, RFR and GBR facilitate easy recalibration and adaptation to different devices and conditions. <sup>7</sup>                                               | Computationally intensive due to the large number of estimators. Prone to overfitting if hyperparameters (like learning rate and number of estimators) are not well-tuned. <sup>8</sup>                     |
| Support Vector Regressor (SVR)    | Works well for both linear and non-linear relationships due to kernel functions and is highly effective for high-dimensional data. <sup>8</sup>                                                                                                                                                                                                                         | It is less effective in low-feature classes. SVR struggles in datasets with a small number of features, as its performance relies on having sufficient dimensionality to distinguish patterns. <sup>8</sup> |
| Multi-Layer Perceptron (MLP)      | Excels at identifying complex patterns and non-linear relationships in the data. <sup>8</sup>                                                                                                                                                                                                                                                                           | Prone to overfitting if not properly regularized and if the data is too simple. Computationally expensive for large datasets due to the complexity of neural network architecture. <sup>8</sup>             |

## Supporting Information

Lysozyme is a widely distributed low-molecular-weight protein with antimicrobial activity. It is commonly found in various species, including viruses, bacteria, fungi, and mammals, and is particularly abundant in bodily fluids such as tears, saliva, milk, and mucus.<sup>10</sup> To further validate the color sensor and ML algorithm, we performed additional protein concentration analysis using colorimetric assays to detect lysozyme and further validate the test.

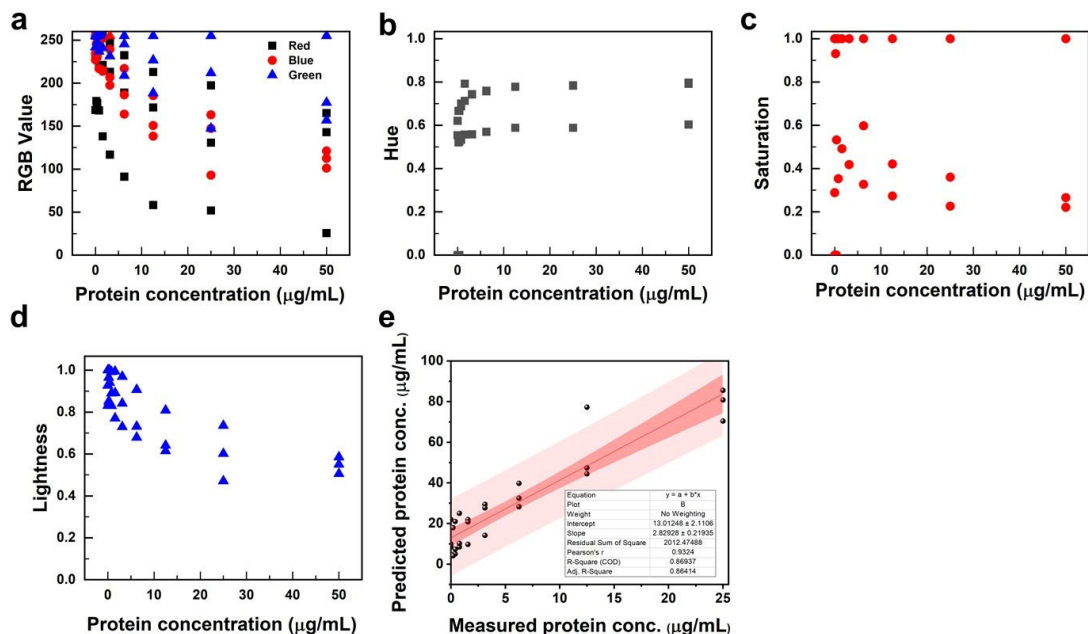

**Figure S10.** RGB color component values vs. frequency of color sensor output values (a), Hue colors (H) with increasing protein concentration (b), Saturation colors (S) with increasing protein concentration (c), Lightness (L) with increasing protein concentration (d) and a scatterplot illustrating prediction vs measured protein concentration of the lysozyme.

## Supporting Information

### References

- 1) Ali Y. M.; Volkan K.; Gizem K. Ö.; Abdullah B.; Nesrin H.; Mehmet E. S., Smartphone-based colorimetric detection via machine learning, *Analyst*, **2017**, *142*, 2434, doi: 10.1039/C7AN00741H.
- 2) Saptami, R.; Protik, C.B.; Md, A.H.; Md, R.I.; John, C. Polynomial regression of multiple sensing variables for high-performance smartphone colorimeter. *OSA Contin.* **2021**, *4*, 374–384.
- 3) Antela, K. U.; Sáez-Hernández, R.; Cervera, M. L.; Morales-Rubio, Á.; Luque, M. J. Development of an automated colorimeter controlled by Raspberry Pi4, *Analytical Methods*, **2023**, *15*, 512-518, doi: 10.1039/D2AY01532C.
- 4) Singh, H.; Singh, G.; Mahajan, D. K.; Kaur, N.; Singh, N., A Low-Cost Device for Rapid ‘Color to Concentration’ Quantification of Cyanide in Real Samples Using Paper-Based Sensing Chip, *Sens. Actuators, B*, **2020**, *322*, 128622.
- 5) (a) Rodriguez-Galiano, V.; Sanchez-Castillo, M.; Chica-Olmo, M.; Chica-Rivas, M., *Ore Geol. Rev.*, **2015**, *71*, 804–818; (b) Saini, C.; Mahato, K. D.; Azad, C.; Kumar, U., *Proc. Int. Conf. Artif. Intell. Appl. (ICAIA), ATCON-1*, **2023**.
- 6) (a) Lee, T., Lee, H.-T., Hong, J., Roh, S., Lee, K., Choi, Y., Hong, Y., Hwang, H.-J.; Lee, G., *Anal. Methods*, **2022**, *14*, 4749–4755.; (b) Kumar, A.; Mahato, K. D.; Azad, C.; Kumar, U., *Proc. Int. Conf. Adv. Global Eng. Challenges (AGEC)*, **2023**, 118–123.
- 7) Jackman, P., Sun, D.-W. and ElMasry, G., *Meat Sci.*, 2012, *91*, 402–407.
- 8) Langsetmo, L.; Schousboe, J. T.; Taylor, B. C.; Cauley, J. A.; Fink, H. A.; Cawthon, P. M.; Kado, D. M.; Ensrud, K. E., *JBMR Plus*, **2023**, *7*, e10757.
- 9) Mahato, K. D.; Das, S. S. G. K.; Azad, C.; Kumar, U., *APL Mach. Learn.*, **2024**, *2*, 016101.
- 10) Pelligrini, A., Thomas, U., and Bramaz, N., *J. Appl. Microbiol.*, 1997, *82*, 682–688
